# Supplementary material for: Phylogenomics reveals the history of host use in mosquitoes
Source: PubMed Central journal article supplement (PMC10558525; doi:10.1038/s41467-023-41764-y), 2023-10-06
Supplement: 41467_2023_41764_MOESM4_ESM.pdf [file 41467_2023_41764_MOESM4_ESM.pdf]

## **Description of Additional Supplementary Files Document**

### **Supplementary Data 1**

Description: The list of species used in our analyses, with bioregion where mosquitoes we analysed are found.

### **Supplementary Data 2**

Description: The details on where particular specimens were collected or data was retrieved from, as well as sequencing platform and data source type (e.g., genomes or transcriptomes or anchor hybrid enrichment).

### **Supplementary Data 3**

Description: Mosquito taxonomy information.

### **Supplementary Data 4**

Description: Mosquito bloodmeal information analysed in this study.
